# Supplementary material
Source: PubMed Central journal article supplement (PMC4900185)
Supplement: Supp_Figure2.pdf [file Supp_Figure2.pdf]

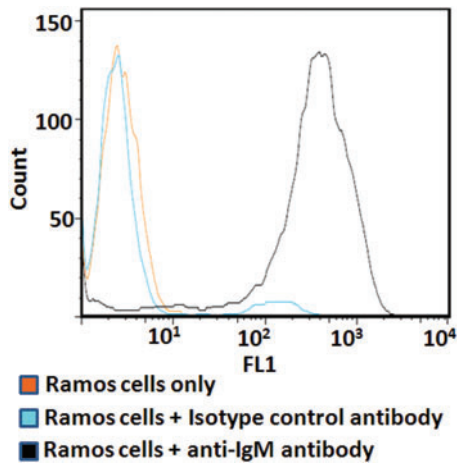

**SUPPLEMENTARY FIG. S2.** Flowcytometric analysis of expression of mIgM on Ramos cells. An alexafluor 488 labeled anti-mIgM antibody (1  $\mu$ g) was incubated with  $2.5 \times 10^5$  Ramos cells on ice for 45 min. After washing with 1 mL of phosphate-buffered saline and reconstituting in 500  $\mu$ L of binding buffer, the sample was analyzed by flowcytometry. Fluorescence intensity on the *x*-axis for FL1 shifts to a higher value in the presence of the antibody, indicating BCR expression in Ramos cells. BCR, B-cell receptor complex.
