# Supplementary material
Source: PubMed Central journal article supplement (PMC4900185)
Supplement: Supp_Figure3.pdf [file Supp_Figure3.pdf]

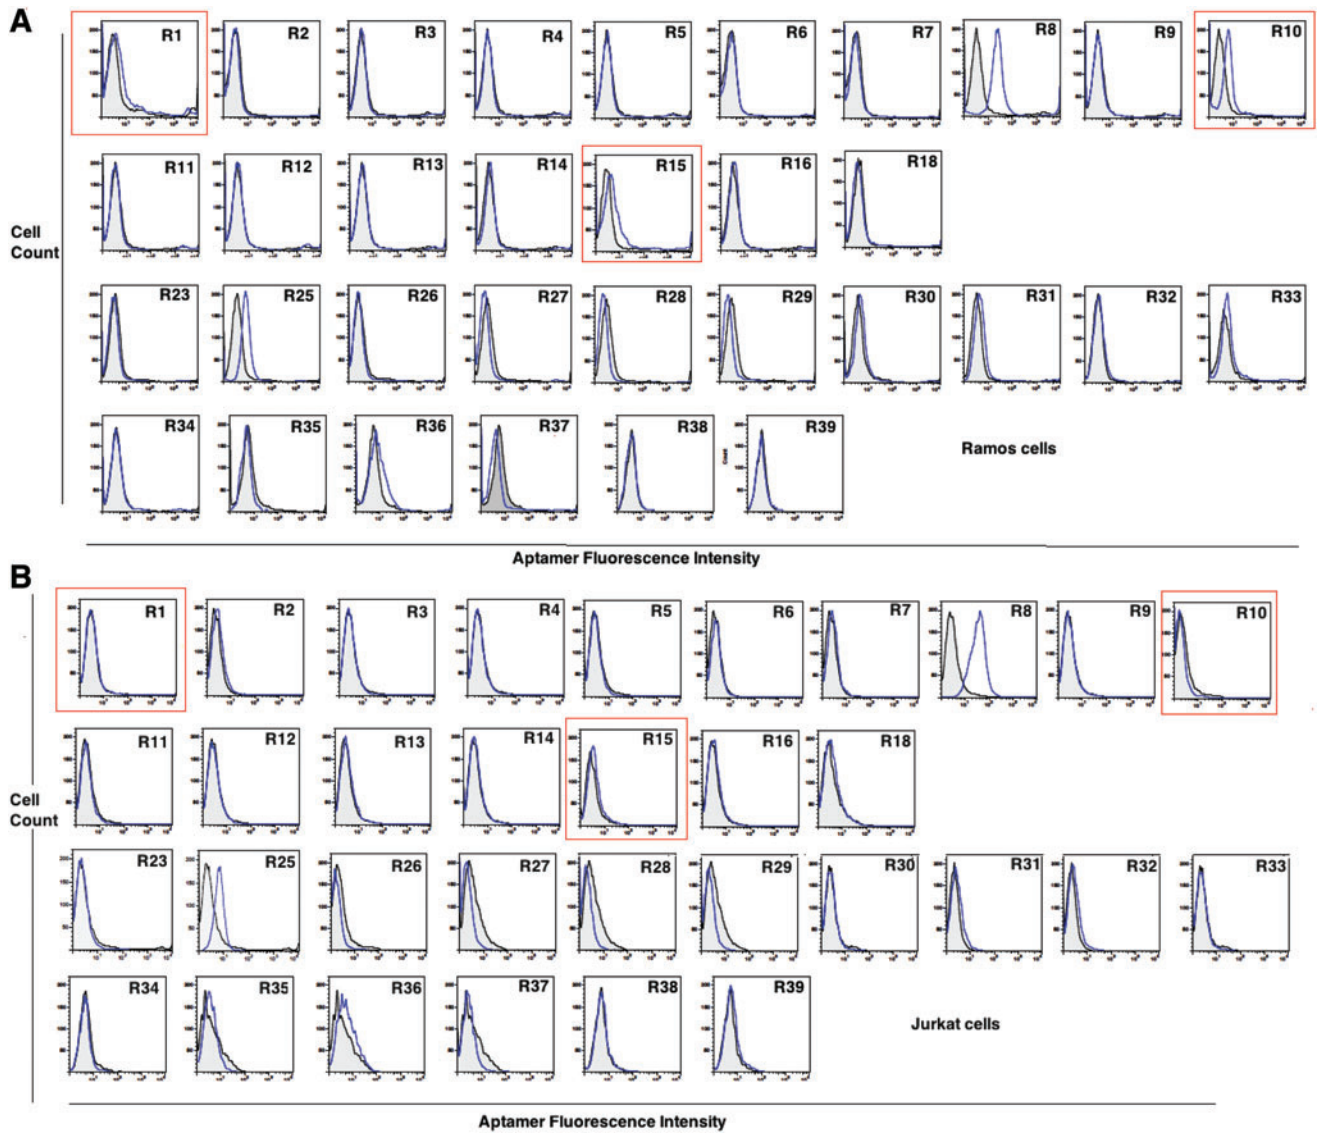

**SUPPLEMENTARY FIG. S3.** Analysis of binding specificity of aptamers selected using ligand-guided selection against Ramos cells (**A**) and Jurkat.E6 cells (**B**). FITC-labeled aptamers and random library were incubated with  $1.0$  or  $0.5 \times 10^5$  Ramos cells on ice for 45 min to 1 h. After washing twice with 0.5 or 1 mL of wash buffer, the sample was reconstituted in 250  $\mu$ L of wash buffer and analyzed by flow cytometry by counting 5000 events. FITC, fluorescein isothiocyanate.
