# Supplementary material
Source: PubMed Central journal article supplement (PMC4900185)
Supplement: Supp_Figure4.pdf [file Supp_Figure4.pdf]

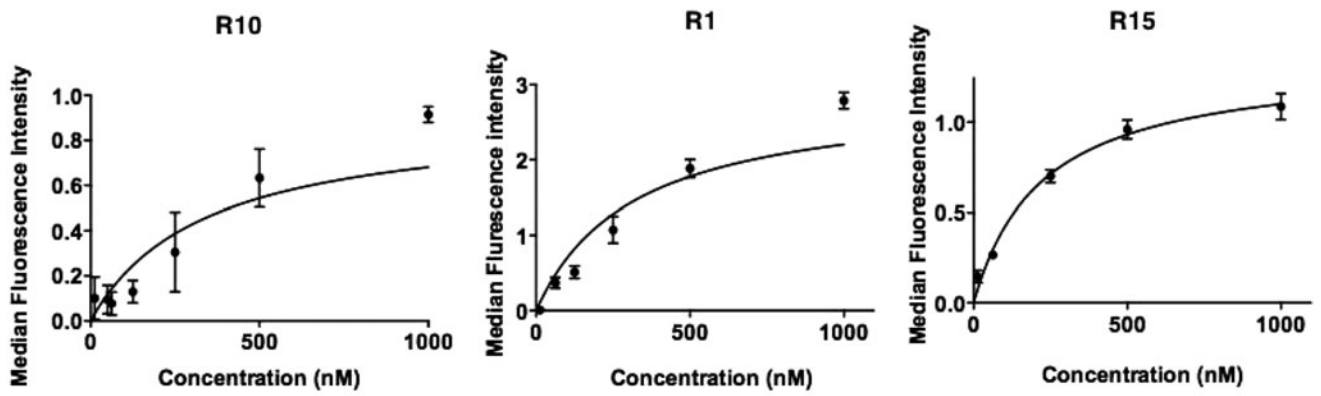

**SUPPLEMENTARY FIG. S4.** Affinity curves for R1, R10, and R15. The affinities of aptamer sequences were evaluated by incubating Ramos cells ( $2.0 \times 10^5$ ) with a series of concentrations ( $0.5 \mu\text{M}$  to  $1 \text{ nM}$ ) of FITC-labeled aptamers in  $200 \mu\text{L}$  of binding buffer on ice for 45 min to an hour. Cells were then washed twice with  $1 \text{ mL}$  of wash buffer at  $4^\circ\text{C}$  and reconstituted in  $400 \mu\text{L}$  of wash buffer. The binding of the constructs was analyzed using flow cytometry by counting 5000 events for each concentration. The calculation of  $B_{\text{max}}/2$  was done using the same method described in Sefah *et al.* [11].
