# Supplementary material
Source: PubMed Central journal article supplement (PMC4900185)
Supplement: Supp_Figure5.pdf [file Supp_Figure5.pdf]

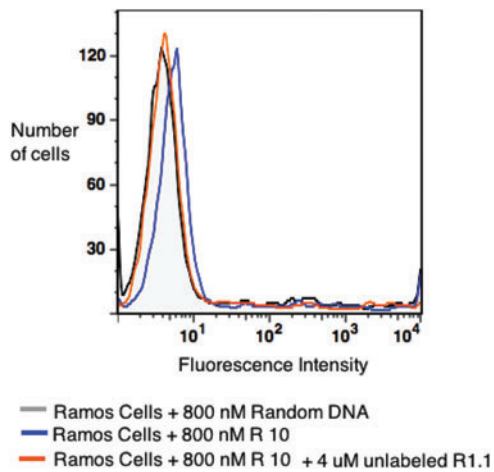

**SUPPLEMENTARY FIG. S5.** Investigation of competition between R10 and R1.  $7.5 \times 10^4$  of Ramos cells were incubated with either fluorescently labeled R10 or a cocktail of fluorescently labeled R10 and unlabeled R1.1 for 1 h. Cells were washed with 1.5 mL of wash buffer, and the binding of R10 was analyzed by flowcytometry. When R10 alone was incubated with Ramos cells (*blue*), aptamer binding was observed. However, when R10 and five times excess of unlabeled R1.1 was incubated with Ramos cells, the binding of R10 (*orange*) was diminished, suggesting that R1.1 and R10 competes to binding to the same protein antigen.
