# Supplementary material
Source: PubMed Central journal article supplement (PMC4900185)

## Supplementary Data

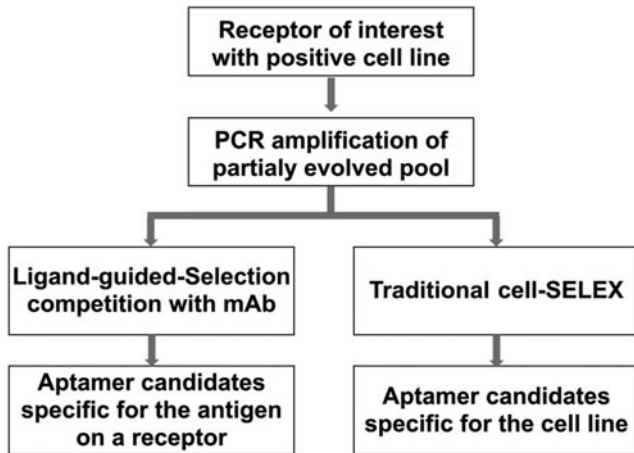

**SUPPLEMENTARY FIG. S1.** Outline of ligand-guided selection.

Supplement: Supp_Figure1.pdf [file Supp_Figure1.pdf]
